# Supplementary material for: Maternal Prenatal Factors and Child Adiposity in Associations with Cardiometabolic Risk Factors in Term-Born Chinese Children at the Age of 2 Years
Source: MDPI journal article supplement (doi:10.3390/nu15153342), 2023-07-27
Supplement: s1 [file s1]

Table S1. The associations between child overweight and obesity and cardio-metabolic risk factors.

|                 | boys                           |           |                    |         | girls                 |           |                    |         |
|-----------------|--------------------------------|-----------|--------------------|---------|-----------------------|-----------|--------------------|---------|
|                 | n                              | Mean±SD   | β (95% CI)         | p value | n                     | Mean±SD   | β (95% CI)         | p value |
| ZWFL            | Glucose (mmol/L)               |           |                    |         | Glucose (mmol/L)      |           |                    |         |
| -1 to 1         | 148                            | 5.01±0.56 | Ref.               |         | 138                   | 4.85±0.54 | Ref.               |         |
| >1 to ≤2        | 43                             | 5.03±0.61 | 0.01(-0.18,0.20)   | 0.95    | 42                    | 4.82±0.69 | -0.03(-0.24,0.18)  | 0.77    |
| >2              | 9                              | 5.03±0.62 | 0.01(-0.36,0.39)   | 0.94    | 6                     | 5.16±0.35 | 0.3(-0.19,0.80)    | 0.23    |
| <-1             | 15                             | 5.02±0.39 | 0.01(-0.29,0.30)   | 0.95    | 16                    | 5.06±0.93 | 0.22(-0.10,0.53)   | 0.18    |
| ZWFL continuous |                                |           | 0.01 (-0.07,0.08)  | 0.82    |                       |           | -0.00 (-0.10,0.09) | 0.94    |
|                 | Log (insulin), pmol/L          |           |                    |         | Log (insulin), pmol/L |           |                    |         |
| -1 to 1         | 148                            | 3.22±0.91 | Ref.               |         | 138                   | 3.31±0.82 | Ref.               |         |
| >1 to ≤2        | 43                             | 3.5±0.84  | 0.25(-0.06,0.56)   | 0.11    | 42                    | 3.46±0.83 | 0.14(-0.14,0.43)   | 0.32    |
| >2              | 9                              | 3.58±1.22 | 0.34(-0.27,0.95)   | 0.27    | 6                     | 3.92±0.77 | 0.6(-0.07,1.28)    | 0.08    |
| <-1             | 15                             | 2.76±0.86 | -0.47(-0.94,0.01)  | 0.06    | 16                    | 3.19±1    | -0.12(-0.55,0.31)  | 0.58    |
| ZWFL continuous |                                |           | 0.19 (0.07, 0.31)  | 0.002   |                       |           | 0.09 (-0.03, 0.22) | 0.14    |
|                 | total cholesterol (TC), mmol/L |           |                    |         | TC, mmol/L            |           |                    |         |
| -1 to 1         | 148                            | 4.15±0.68 | Ref.               |         | 138                   | 4.17±0.74 | Ref.               |         |
| >1 to ≤2        | 43                             | 4.15±0.67 | -0.04(-0.27,0.19)  | 0.74    | 42                    | 4.35±0.73 | 0.17(-0.08,0.43)   | 0.19    |
| >2              | 9                              | 4.11±0.45 | -0.07(-0.52,0.38)  | 0.76    | 6                     | 4.46±0.85 | 0.28(-0.32,0.88)   | 0.36    |
| <-1             | 15                             | 3.74±0.89 | -0.42(-0.77,-0.06) | 0.02    | 16                    | 4.19±0.83 | 0.01(-0.37,0.39)   | 0.95    |
| ZWFL continuous |                                |           | 0.03 (-0.06,0.12)  | 0.51    |                       |           | 0.07 (-0.04,0.18)  | 0.21    |
|                 | Triglyceride, mmol/L           |           |                    |         | Triglyceride, mmol/L  |           |                    |         |
| -1 to 1         | 148                            | 1.12±0.71 | Ref.               |         | 138                   | 1.02±0.58 | Ref.               |         |
| >1 to ≤2        | 43                             | 1.16±0.71 | 0.02(-0.22,0.25)   | 0.90    | 42                    | 1.04±0.42 | 0.01(-0.17,0.20)   | 0.90    |
| >2              | 9                              | 0.93±0.28 | -0.21(-0.67,0.25)  | 0.37    | 6                     | 1.36±0.65 | 0.34(-0.10,0.77)   | 0.14    |
| <-1             | 15                             | 0.94±0.54 | -0.18(-0.54,0.18)  | 0.34    | 16                    | 1.26±0.47 | 0.23(-0.05,0.51)   | 0.11    |
| ZWFL continuous |                                |           | 0.02 (-0.07,0.12)  | 0.60    |                       |           | 0.01 (-0.07,0.10)  | 0.73    |
|                 | HDL, mmol/L                    |           |                    |         | HDL, mmol/L           |           |                    |         |
| -1 to 1         | 148                            | 1.41±0.34 | Ref.               |         | 138                   | 1.36±0.29 | Ref.               |         |
| >1 to ≤2        | 43                             | 1.41±0.38 | 0(-0.12,0.12)      | 0.98    | 42                    | 1.41±0.32 | 0.05(-0.05,0.15)   | 0.35    |
| >2              | 9                              | 1.49±0.46 | 0.08(-0.16,0.31)   | 0.51    | 6                     | 1.26±0.25 | -0.11(-0.34,0.13)  | 0.38    |
| <-1             | 15                             | 1.44±0.3  | 0.03(-0.15,0.22)   | 0.74    | 16                    | 1.36±0.28 | -0.01(-0.16,0.15)  | 0.94    |
| ZWFL continuous |                                |           | 0.00 (-0.04,0.05)  | 0.87    |                       |           | 0.03 (-0.01,0.08)  | 0.16    |
|                 | LDL, mmol/L                    |           |                    |         | LDL, mmol/L           |           |                    |         |
| -1 to 1         | 148                            | 2.34±0.5  | Ref.               |         | 138                   | 2.39±0.58 | Ref.               |         |
| >1 to ≤2        | 43                             | 2.29±0.48 | -0.05(-0.22,0.11)  | 0.52    | 42                    | 2.48±0.49 | 0.08(-0.11,0.27)   | 0.41    |
| >2              | 9                              | 2.22±0.32 | -0.12(-0.45,0.21)  | 0.48    | 6                     | 2.57±0.52 | 0.18(-0.27,0.63)   | 0.44    |
| <-1             | 15                             | 2.09±0.52 | -0.25(-0.51,0.01)  | 0.06    | 16                    | 2.38±0.6  | -0.02(-0.31,0.26)  | 0.88    |
| ZWFL continuous |                                |           | -0.01 (-0.07,0.06) | 0.86    |                       |           | 0.03 (-0.05,0.12)  | 0.41    |

ZWFL: weight-for-length z-score; All models were adjusted for child age.

Table S2. Age-adjusted partial Pearson correlation coefficients between cardio-metabolic risk factors among term-born Chinese boys and girls aged 2 years

|              | SBP<br>(mmHg) | DBP<br>(mmHg) | Glucose<br>(mmol/L) | log(insulin),<br>pmol/L | TC<br>(mmol/L) | Triglyceride,<br>mmol/L | HDL,<br>mmol/L |
|--------------|---------------|---------------|---------------------|-------------------------|----------------|-------------------------|----------------|
| <b>boys</b>  |               |               |                     |                         |                |                         |                |
| SBP          | 1             |               |                     |                         |                |                         |                |
| DBP          | 0.69***       | 1             |                     |                         |                |                         |                |
| Glucose      | -0.06         | -0.04         | 1                   |                         |                |                         |                |
| log(insulin) | 0.16*         | -0.02         | 0.43***             | 1                       |                |                         |                |
| TC           | -0.04         | -0.05         | -0.12               | 0.02                    | 1              |                         |                |
| TG           | 0.04          | -0.01         | 0.11                | 0.05                    | 0.09           | 1                       |                |
| HDL          | 0.06          | 0.08          | -0.05               | 0.14                    | 0.41***        | -0.21**                 | 1              |
| LDL          | -0.12         | -0.10         | -0.12               | -0.02                   | 0.91***        | -0.10                   | 0.30***        |
| <b>girls</b> |               |               |                     |                         |                |                         |                |
| SBP          | 1             |               |                     |                         |                |                         |                |
| DBP          | 0.61***       | 1             |                     |                         |                |                         |                |
| Glucose      | 0.003         | 0.03          | 1                   |                         |                |                         |                |
| log(insulin) | 0.09          | 0.14          | 0.26**              | 1                       |                |                         |                |
| TC           | 0.07          | -0.01         | -0.046              | -0.10                   | 1              |                         |                |
| TG           | 0.05          | 0.11          | 0.04                | 0.01                    | 0.001          | 1                       |                |
| HDL          | 0.04          | -0.03         | -0.08               | -0.08                   | 0.41***        | -0.32***                | 1              |
| LDL          | 0.04          | -0.05         | -0.03               | -0.09                   | 0.94***        | -0.10                   | 0.31***        |

\* p < 0.05; \*\* p < 0.01; \*\*\* p < 0.001

TC: total cholesterol

Sample size varies from 558 to 424 in serum measures due to missing blood samples.
